# Supplementary figures and images for: Mouse brain contains age-dependent extraparenchymal granular structures and astrocytes, both reactive to natural IgM antibodies, linked to the fissura magna
Source: PubMed Central journal article supplement — Immun Ageing. 2024 Aug 21;21:56. doi: 10.1186/s12979-024-00460-1 (PMC11337560; doi:10.1186/s12979-024-00460-1), 2024-08-21

## ICR-CD1

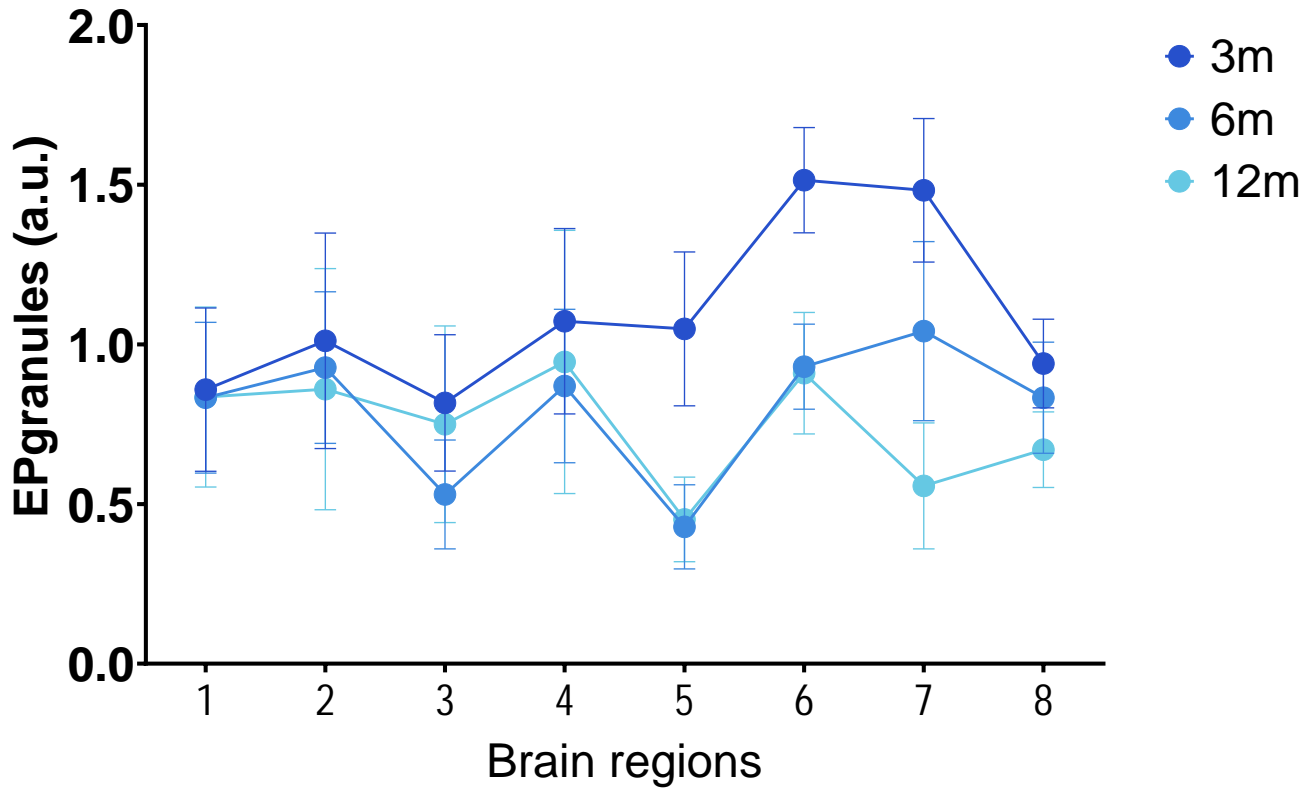

## SAMP8

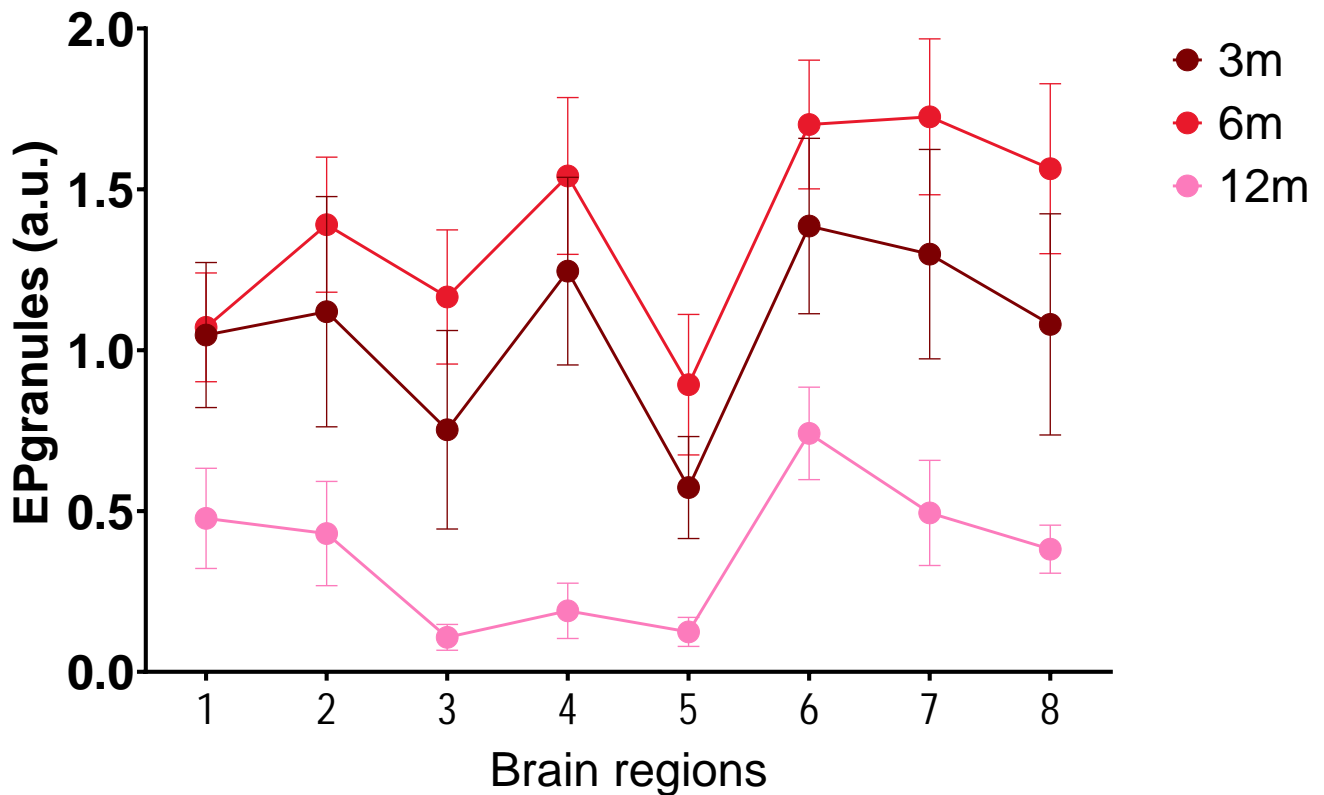

Supplement: 12979_2024_460_MOESM2_ESM.pdf [file 12979_2024_460_MOESM2_ESM.pdf]
